# Supplementary material for: Stereochemical determination of the unique acrylate moiety at the 17-position in chlorophylls-c from a diatom Chaetoseros calcitrans and its effect upon electronic absorption properties
Source: Royal Society of Chemistry journal article supplement (doi:10.1039/b900802k), 2009-01-01
Supplement: b900802k.pdf [file b900802k.pdf]

***Supporting Information for***

**Stereochemical Determination of the Unique Acrylate Moiety at the 17-Position in  
Chlorophylls-*c* from a Diatom *Chaetoseros calcitrans* and Its Effect upon  
Electronic Absorption Properties**

Tadashi Mizoguchi, Chihiro Nagai, Michio Kunieda, Yuki Kimura, Atsushi Okamura  
and Hitoshi Tamiaki\*

Department of Bioscience and Biotechnology, Faculty of Science and Engineering,  
Ritsumeikan University, Kusatsu, Shiga 525-8577, Japan

**Table S1.** The red-shift values  $\Delta\lambda$ <sup>a</sup> of absorption maxima induced by esterification at the 17<sup>2</sup>-COOH as well as 8<sup>1</sup>,8<sup>2</sup>- and 17<sup>1</sup>,17<sup>2</sup>-dehydrogenations of natural Chls-*c* and their analogs.

|                                                                   | $\Delta\lambda$ / nm |     |     |
|-------------------------------------------------------------------|----------------------|-----|-----|
|                                                                   | Soret                | Qx  | Qy  |
| Esterification                                                    |                      |     |     |
| Chl- <i>c</i> <sub>1</sub> → Chl- <i>c</i> <sub>1</sub> -phy      | 2.4                  | 0.6 | 0.4 |
| Chl- <i>c</i> <sub>2</sub> → Chl- <i>c</i> <sub>2</sub> -phy      | 2.0                  | 0.8 | 0.6 |
| 8 <sup>1</sup> ,8 <sup>2</sup> -Dehydrogenation                   |                      |     |     |
| Chl- <i>c</i> <sub>1</sub> → Chl- <i>c</i> <sub>2</sub>           | 3.8                  | 3.0 | 1.4 |
| Chl- <i>c</i> <sub>1</sub> -phy → Chl- <i>c</i> <sub>2</sub> -phy | 3.6                  | 3.2 | 1.6 |
| PChl- <i>a</i> → 8-vinyl-PChl- <i>a</i>                           | 5.6                  | 3.0 | 2.0 |
| 17 <sup>1</sup> ,17 <sup>2</sup> -Dehydrogenation                 |                      |     |     |
| Chl- <i>c</i> <sub>1</sub> -phy → PChl- <i>a</i>                  | 15.0                 | 7.2 | 5.6 |
| Chl- <i>c</i> <sub>2</sub> -phy → 8-vinyl-PChl- <i>a</i>          | 13.0                 | 7.4 | 5.2 |

<sup>a</sup>All  $\Delta\lambda$ s were calculated using  $\lambda_{\max}$  from Table 2.

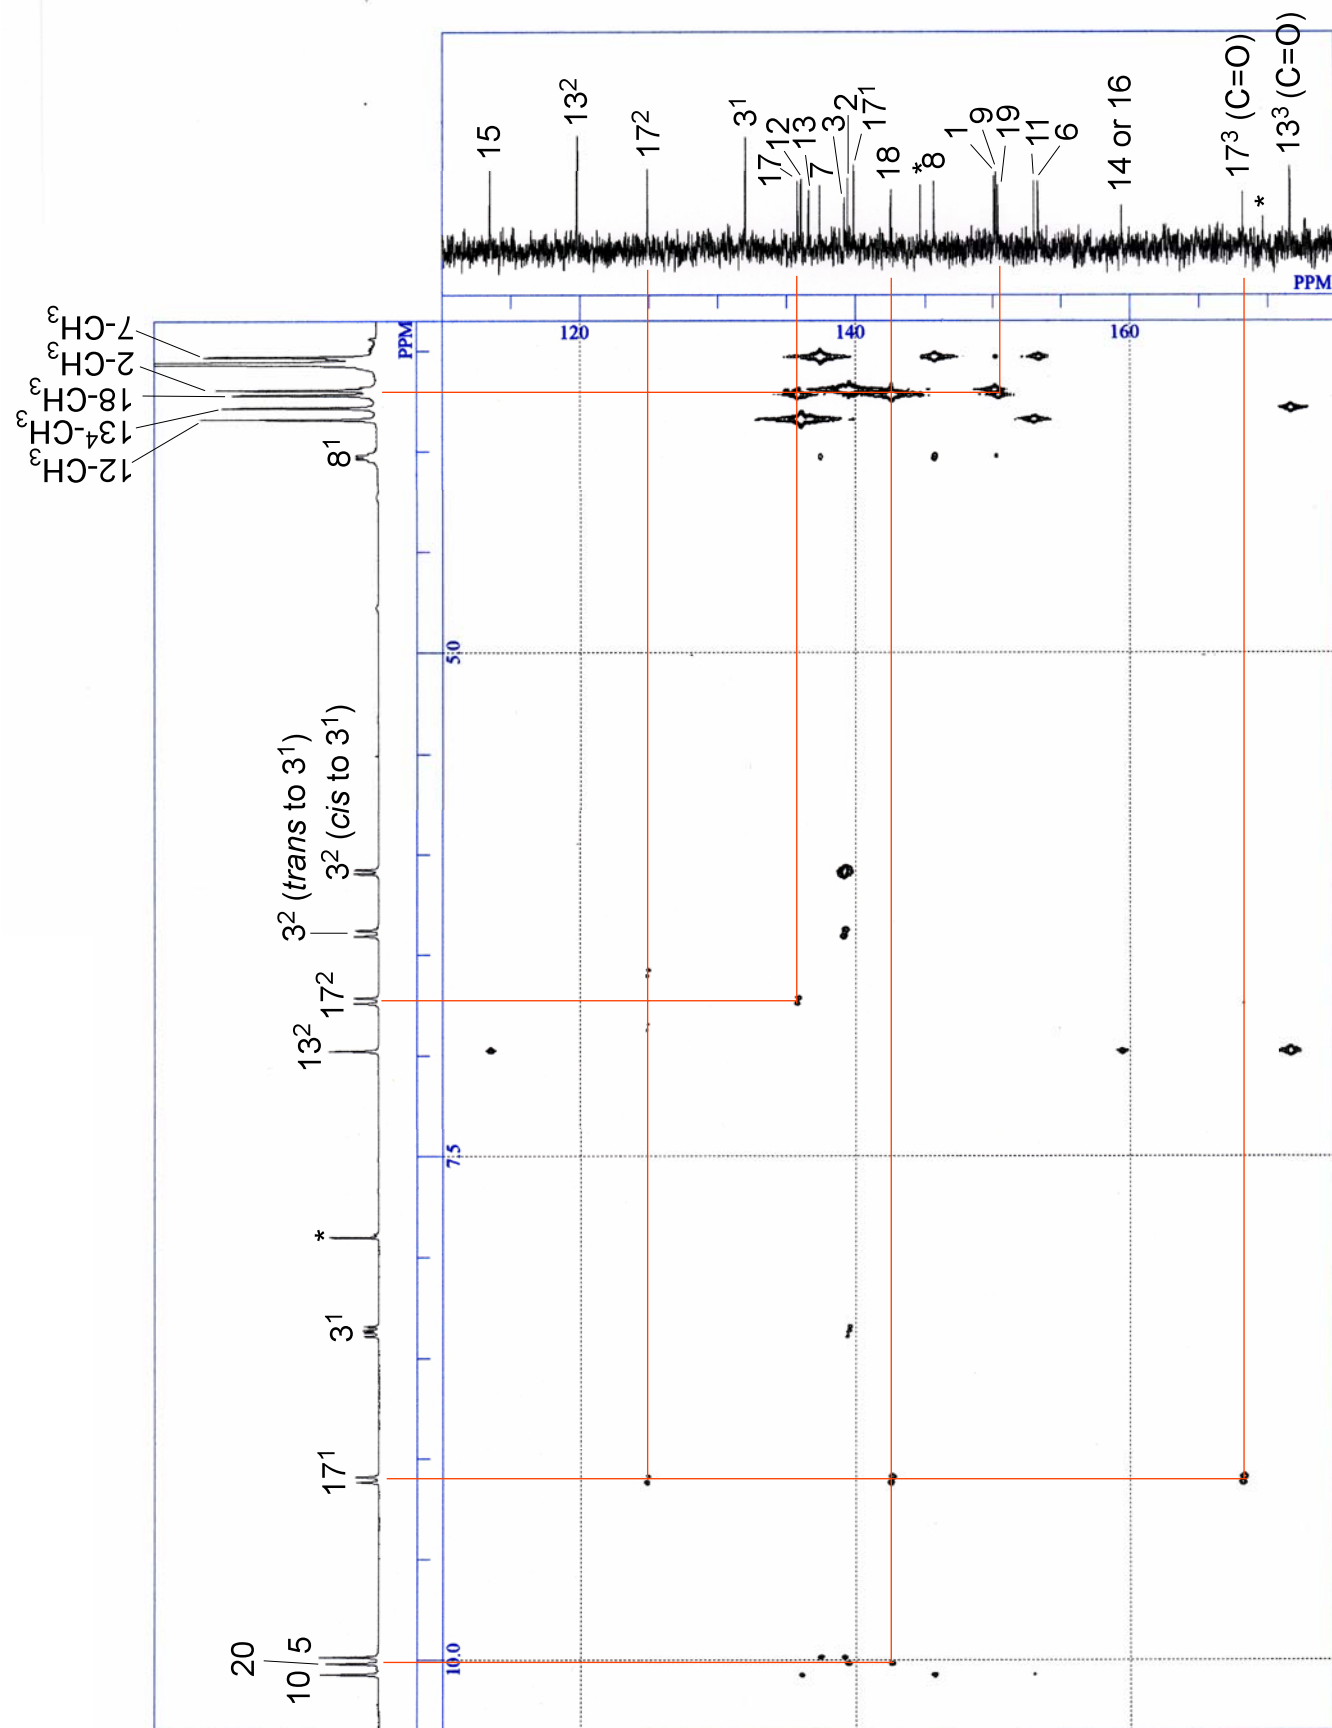

**Figure S1.** Partial HMBC spectrum ( $^nJ_{\text{CH}} = 10\text{Hz}$ ) of Chl- $c_1$  in THF- $d_8$  at room temperature. The key correlations to assign the  $17^1\text{-H}$  and  $17^2\text{-H}$  in the acrylate are indicated by the red lines. Impurities are indicated by asterisks.

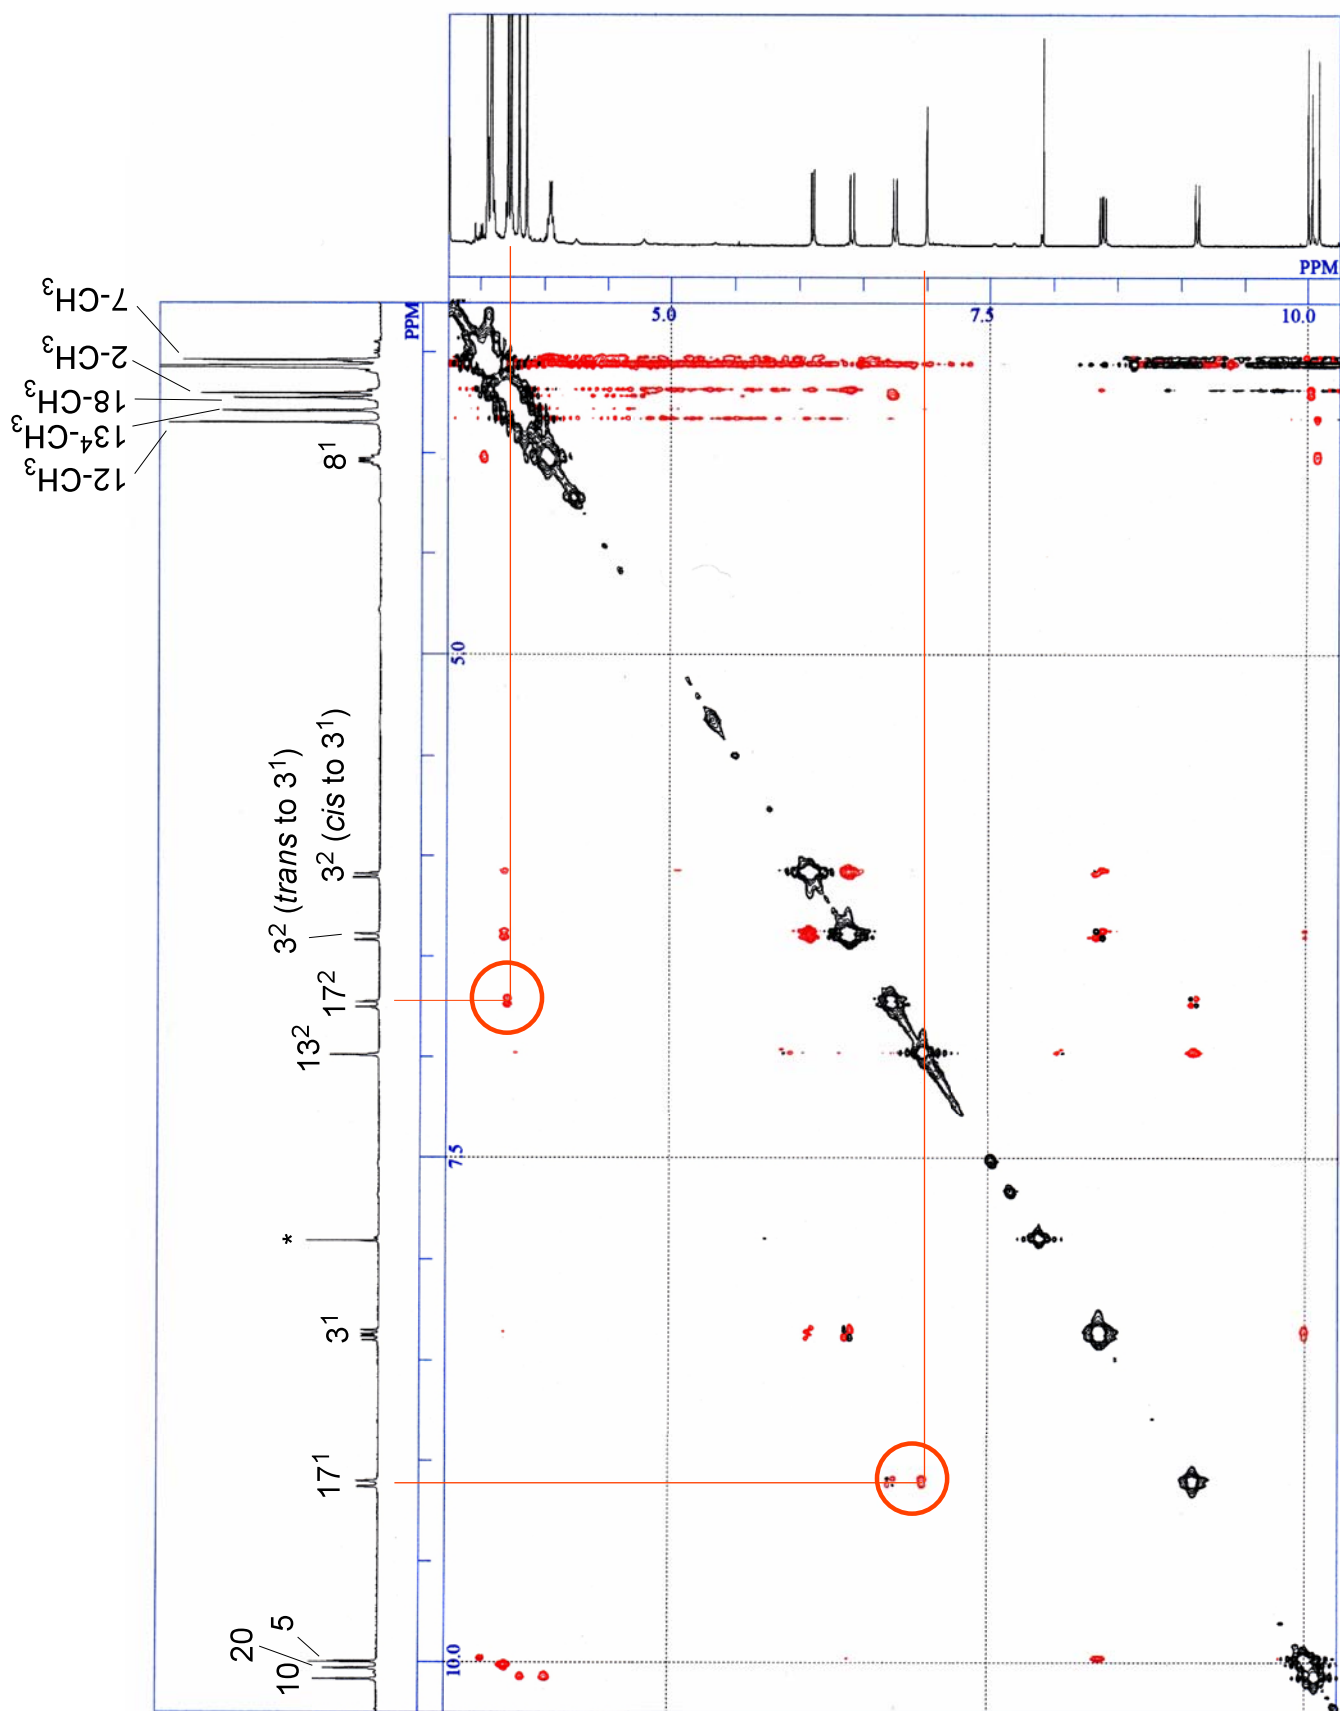

**Figure S2.** Partial NOESY spectrum ( $\tau_m = 600$  msec) of Chl- $c_1$  in THF- $d_8$  at room temperature. The two NOE correlations identifying the conformation of the 17-acrylate, 17<sup>1</sup>-H/13<sup>2</sup>-H and 17<sup>2</sup>-H/18-CH<sub>3</sub> are indicated by the red circles. An impurity is indicated by an asterisk.

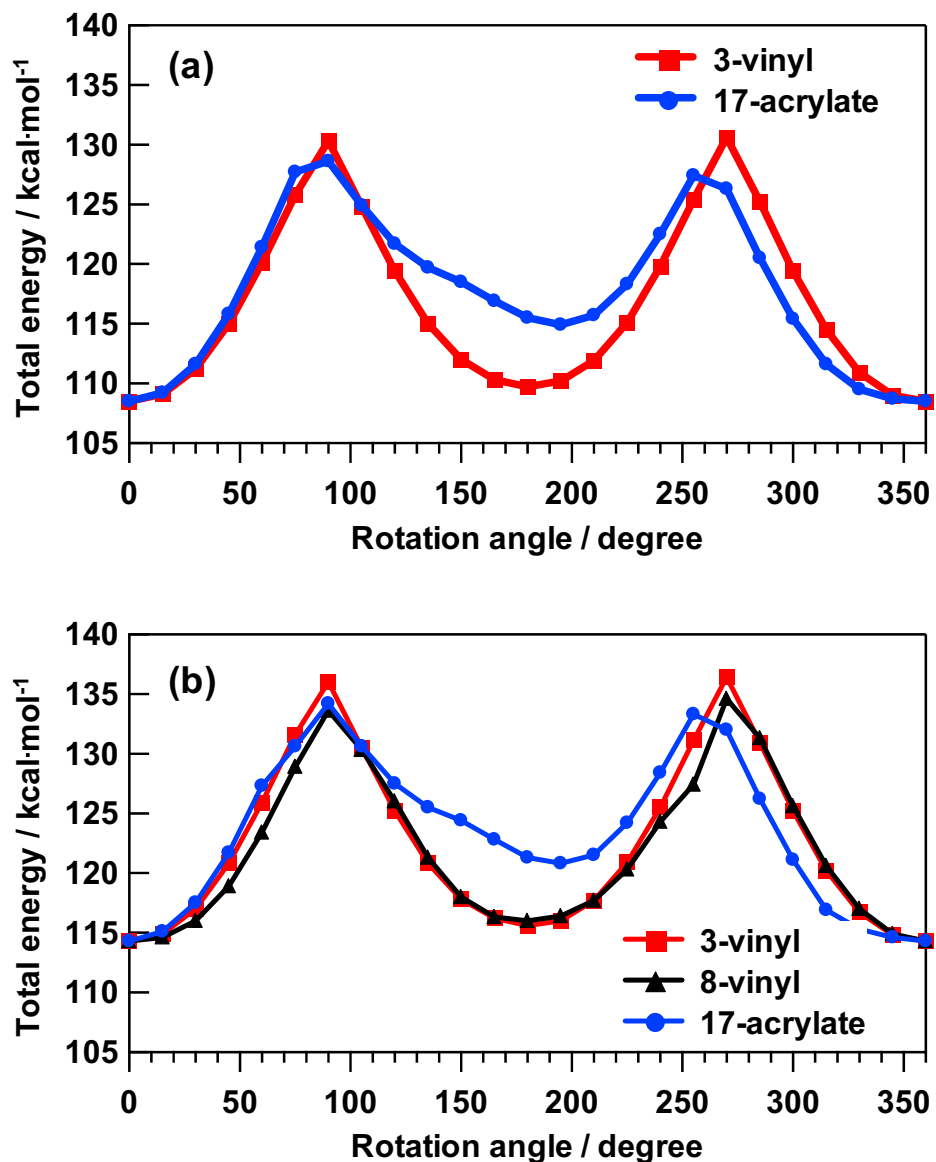

**Figure S3.** Total calculated energies of Chl-*c*<sub>1</sub> (a) and Chl-*c*<sub>2</sub> (b) as a function of the clockwise rotation around the C17–C17<sup>1</sup> bond for the acrylate, the C3–C3<sup>1</sup> for the 3-vinyl and the C8–C8<sup>1</sup> for the 8-vinyl substituents.

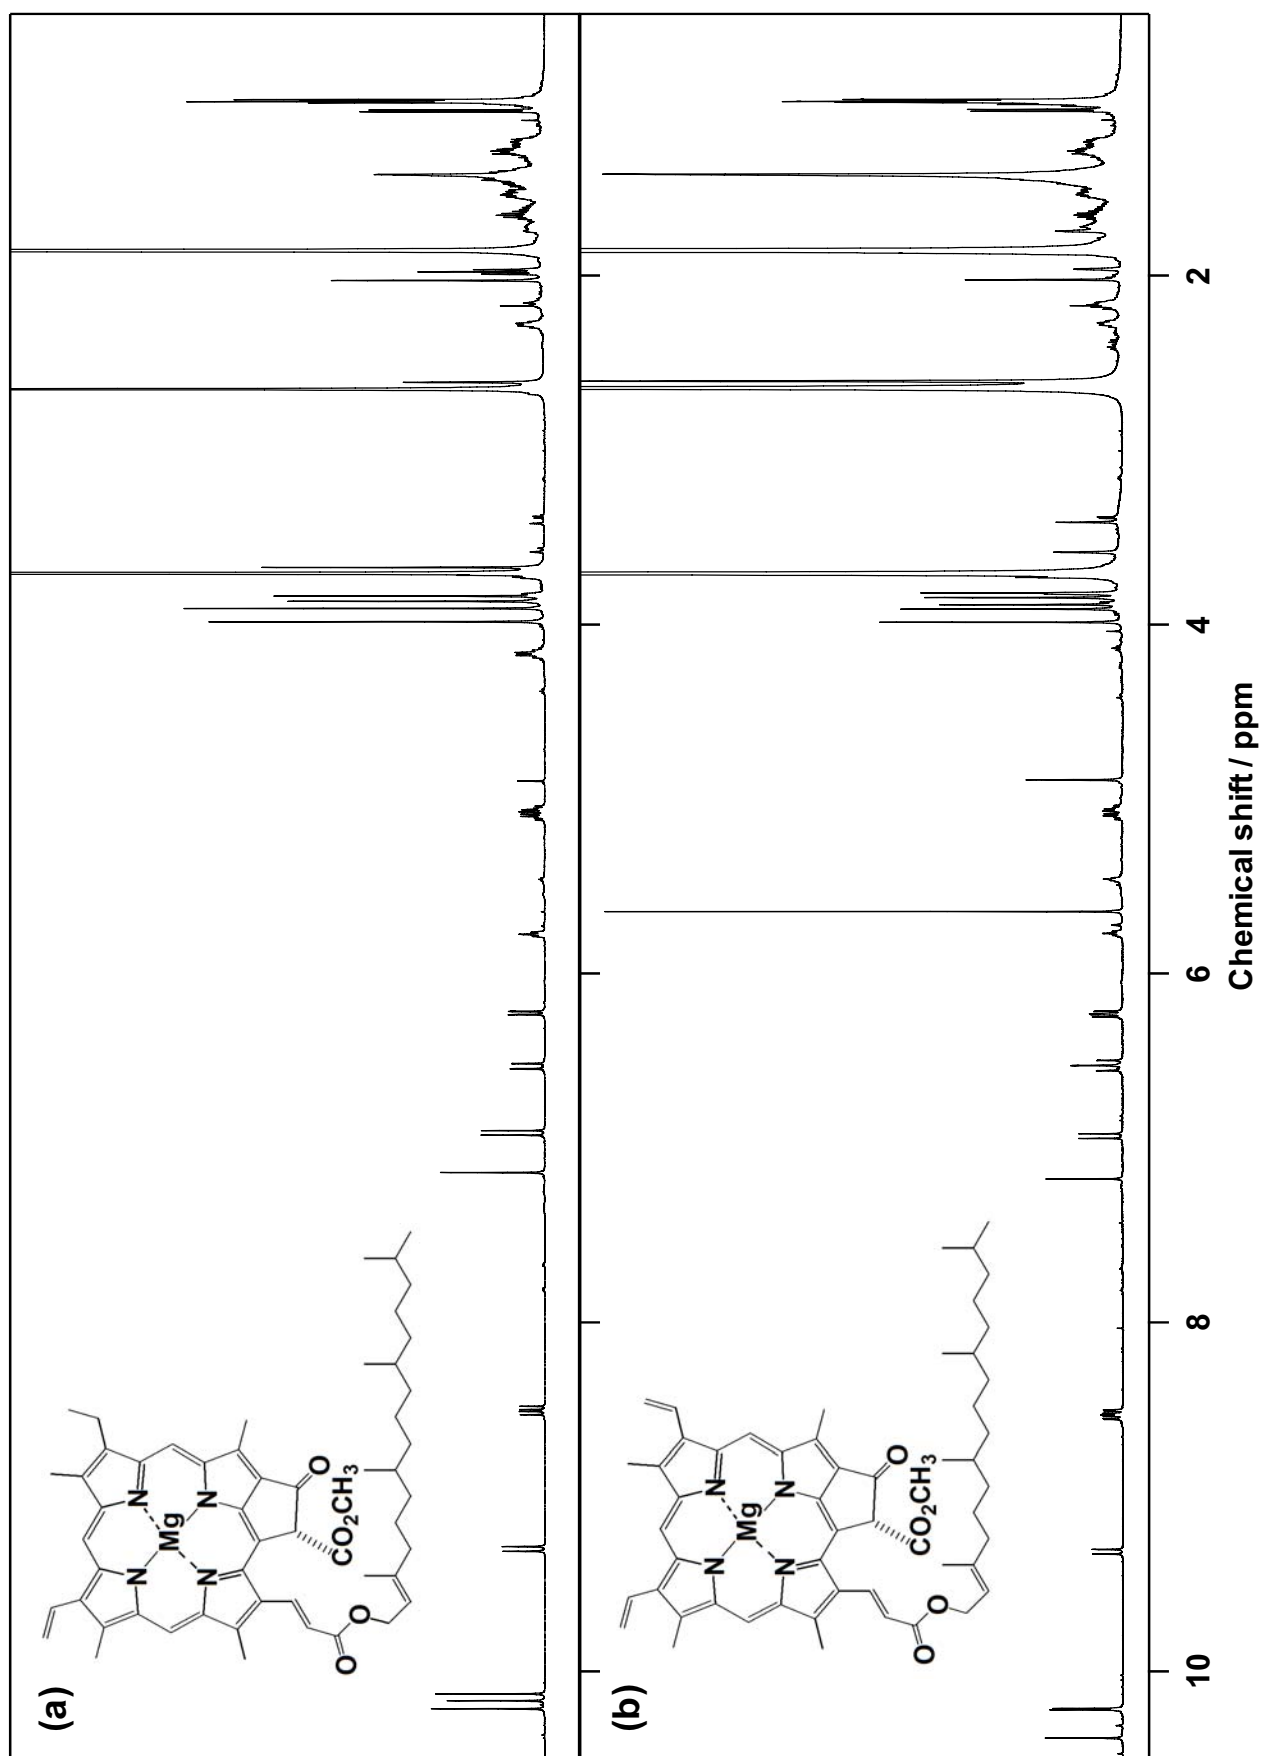

**Figure S4.** <sup>1</sup>H-NMR spectra of the synthetic Chl-c<sub>1</sub>-phy (a) and Chl-c<sub>2</sub>-phy (b) in THF-d<sub>8</sub> at room temperature.

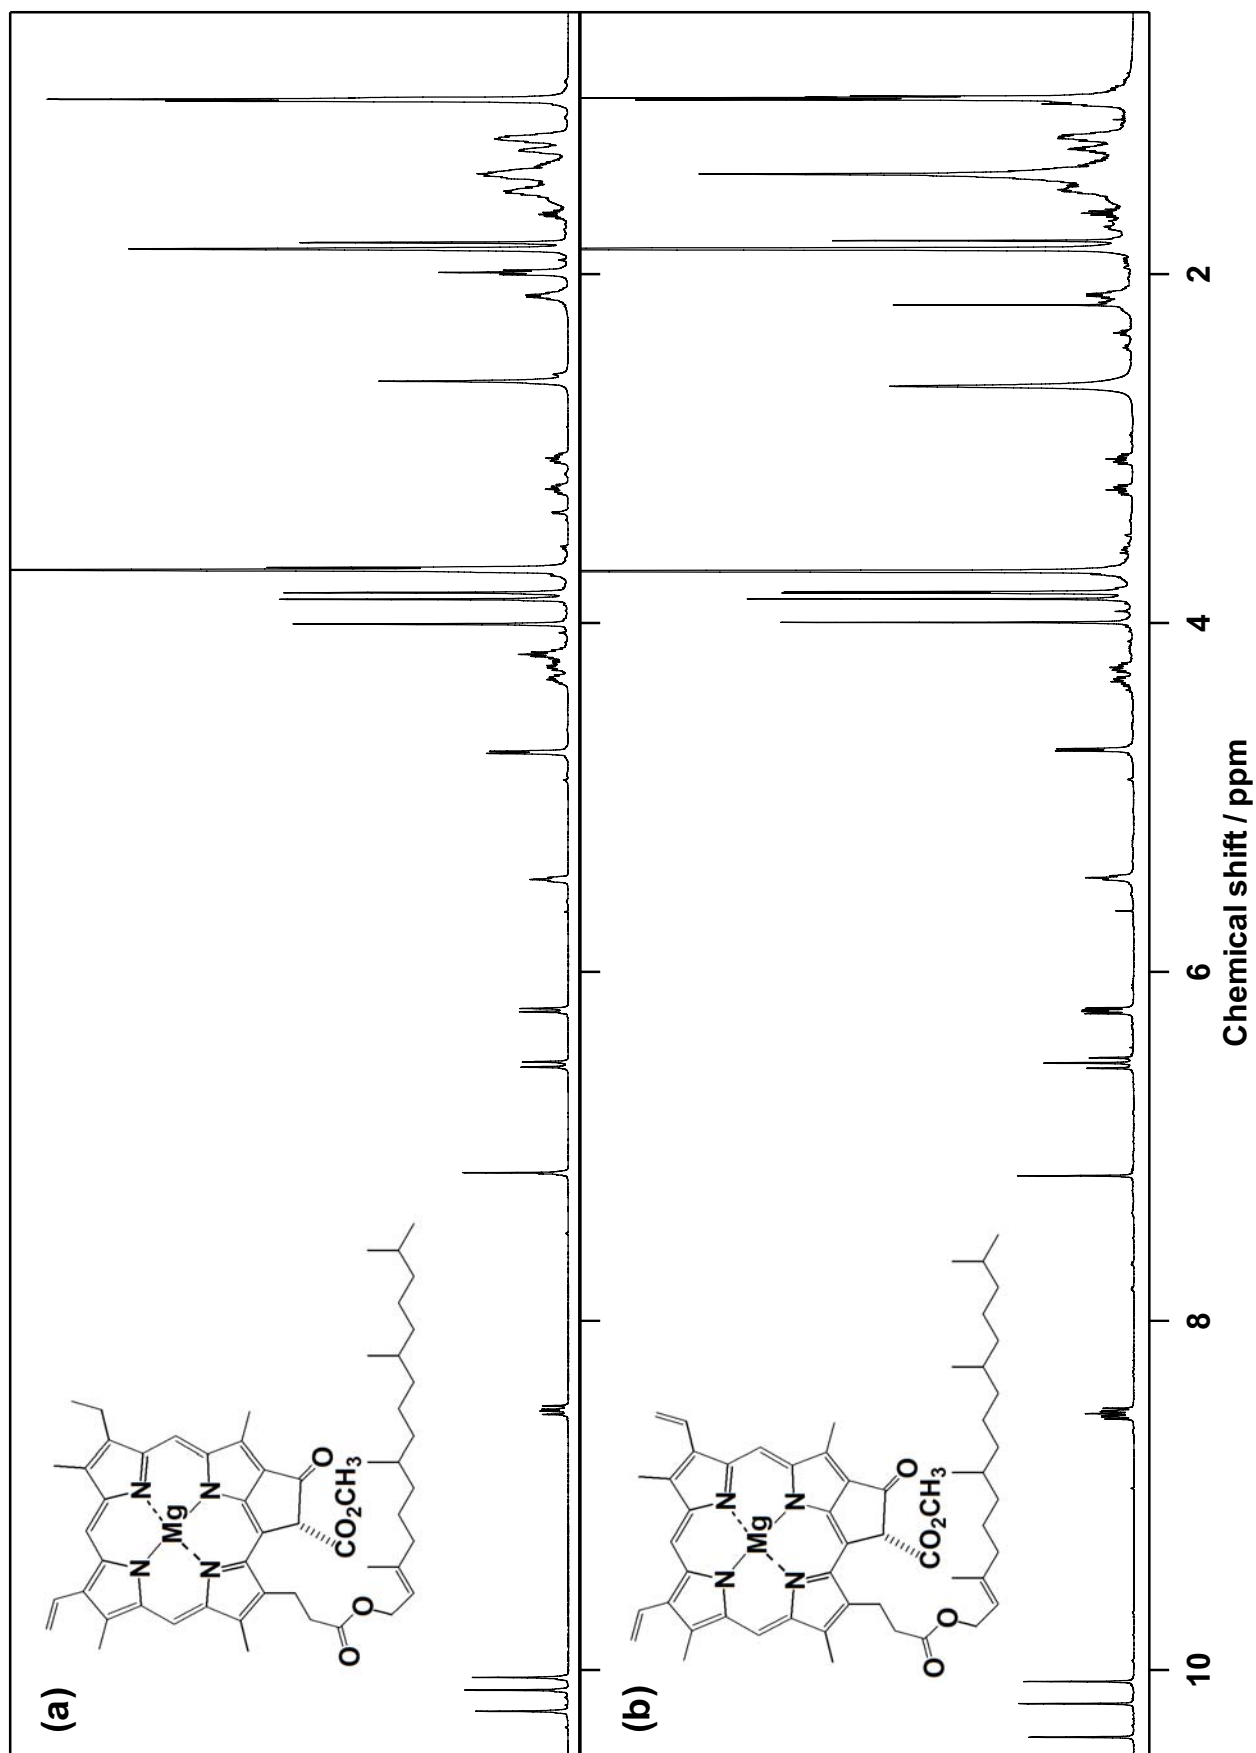

**Figure S5.**  $^1\text{H-NMR}$  spectra of the synthetic PChl-*a* (a) and 8-vinyl-PChl-*a* (b) in  $\text{THF-d}_8$  at room temperature.
